# Supplementary material for: Constructing LiF-rich cathode electrolyte interphase to enhance the cyclic stability of lithium-rich manganese-based oxide cathode
Source: Royal Society of Chemistry journal article supplement (doi:10.1039/d4cc04956j), 2024-12-04
Supplement: d4cc04956j1.pdf [file d4cc04956j1.pdf]

## Supplementary Information

### Constructing LiF-rich Cathode Electrolyte Interphase to Enhance the Cyclic Stability of Lithium-rich Manganese-based Oxide Cathode

Yang Yang <sup>ab</sup>, Yajun Zhao <sup>a</sup>, Junjie Song <sup>ab</sup>, Xiqian Yu <sup>\*ab</sup> and Hong Li <sup>\*ab</sup>

- a. *Institute of Physics, Chinese Academy of Sciences, Beijing, 100190, China.*
- b. *Center of Materials Science and Optoelectronics Engineering, University of Chinese Academy of Sciences, Beijing, 100049, China*

*E-mail: [xyu@iphy.ac.cn](mailto:xyu@iphy.ac.cn), [hli@iphy.ac.cn](mailto:hli@iphy.ac.cn)*

## 1. Experimental

### 1.1 Sample Preparation

$\text{Ni}_{0.12}\text{Co}_{0.12}\text{Mn}_{0.76}\text{CO}_3$  (Zhongwei New Materials Co., Ltd) and  $\text{Li}_2\text{CO}_3$  (Innochem Co., Ltd) were mixed at a weight ratio of 1:1.4 and reacted at 500 °C for 5 h under an oxygen atmosphere, and then preserved at 850 °C for 12 h to obtain the bare  $\text{Li}_{1.2}\text{Ni}_{0.13}\text{Co}_{0.13}\text{Mn}_{0.54}\text{O}_2$  (LR-bare).

According to the mass ratio of 1:0.01, 1:0.03, and 1:0.05, LR-bare and fluorinated carbon (CF) were mixed to a total of 2 g, and then spherical ground for 2 h at 200 r min<sup>-1</sup> in a ball mill tank to obtain the composites LR@CF, named LRCF1, LRCF3 and LRCF5 respectively.

Si and C composite material was purchased from Tianmulake Excellent Anode Materials Co., Ltd.

## 1.2 Coin-cell assembling

The cathode electrode was prepared by coating the slurry on Al foil by a ratio of active material: Super P: poly-vinylidene fluoride (PVDF) = 8:1:1, and then cast into  $\Phi 12$  mm tablets. The as-prepared tablets were dried at 120 °C for 24 h in a vacuum oven before assembly. CR2032-type coin-cells were assembled with the tablets as cathode and Li foil as anode in a glovebox filled with argon ( $\text{H}_2\text{O}$  and  $\text{O}_2 < 0.1$  ppm). The electrolyte was 1M  $\text{LiPF}_6$  in ethylene (EC) and dimethyl carbonate (DMC) (3:7 in volume) and the separator was  $\text{Li}_{1.3}\text{Al}_{0.3}\text{Ti}_{1.7}(\text{PO}_4)_3$  (LATP) coated polypropylene (PP)/polyethylene (PE) film.

## 1.3 Full pouch-cells assembling

The anode electrode was prepared by coating the slurry on Cu foil by a ratio of active material: Super P: carboxymethyl cellulose sodium (CMC): styrene-butadiene rubber (SBR)= 96:2:1:1. The prepared cathode and anode electrodes were punched into  $73 \times 60$  mm and  $75 \times 62$  mm rectangular pieces, respectively. All electrodes were dried in a vacuum oven for 24 h (120 °C for cathode and 80 °C for anode) before assembly. Pouch cells were produced in a dry room (dewpoint -60 °C) with a N/P of 1.1.

## 1.4 Characterization

The electrochemical performance of coin-cells was carried out with a Land CT2001A battery test system (Wuhan, PR China) in a voltage range of 2.0-4.8 V under different current rates ( $1\text{C}=250 \text{ mAh g}^{-1}$ ) at room temperature under different current rates ( $1\text{C}=250 \text{ mAh g}^{-1}$ ) at room temperature. And full pouch-cells were tested within a voltage range of 2.05 - 4.75 V during the first charge and discharge at 0.1C. Subsequently, a cycle test was conducted at 0.5C within a voltage range of 2.1 - 4.7 V

(the design capacity is 1.0Ah).

Electrochemical impedance spectroscopy (EIS) was measured by Autolab (Metrohm), with a 5 mV amplitude of AC in the frequency range of 0.01 Hz-100 kHz. The surface morphology and element distribution were observed by Scanning Electron Microscopy (SEM, Hitachi S-840) with Energy Dispersive Spectrometer (EDS). Transmission electron microscope (TEM, JEOL JEM-F200) was used to observe the coating layer structure on the surface of the samples. The structure of materials was measured by an X-ray diffractometer (XRD, Bruker D8) with Cu-K $\alpha$  radiation ( $\lambda = 1.5405 \text{ \AA}$ ) in the  $2\theta$  scan range of 10-80°. X-ray photoelectron spectroscopy (XPS) was recorded by an ESCALAB 250 Xi system (Thermo Scientific).

## 2. Supplementary Figures

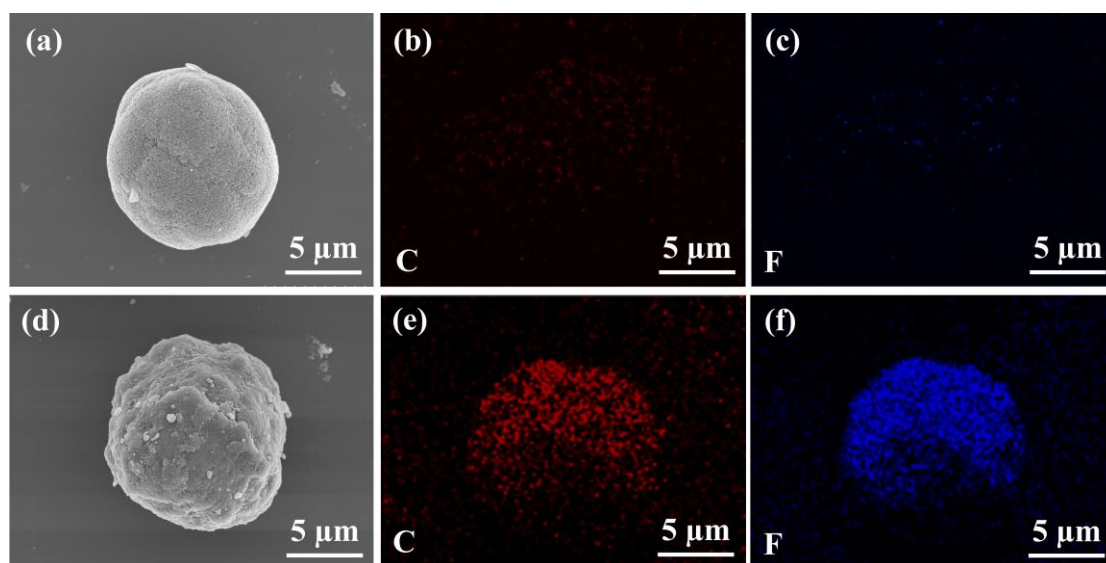

Fig S1. SEM-EDS mapping images of (a-c) LR-bare and (d-f) LR@CF<sub>3</sub> samples.

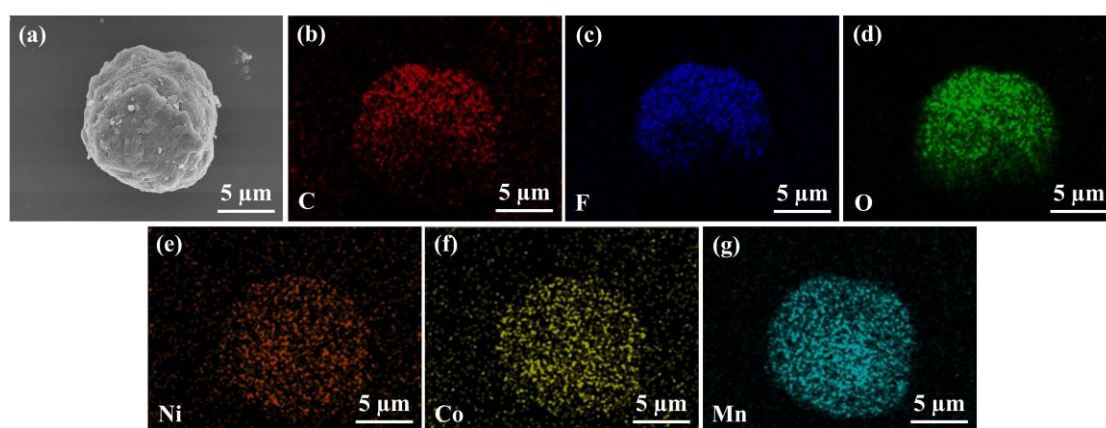

Fig S2. The EDS mapping spectrum of different elements on the surface of LR@CF,

(a) LR@CF, (b) C, (c) F, (d) O, (e) Ni, (f) Co, (g) Mn.

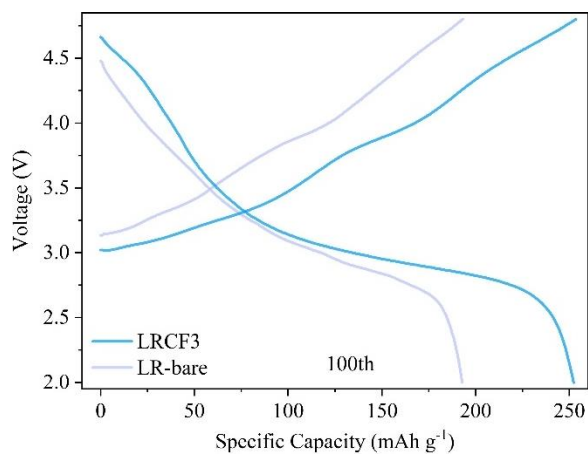

Fig S3. Charge and discharge curves of LR-bare and LRCF3 after 100 cycles.

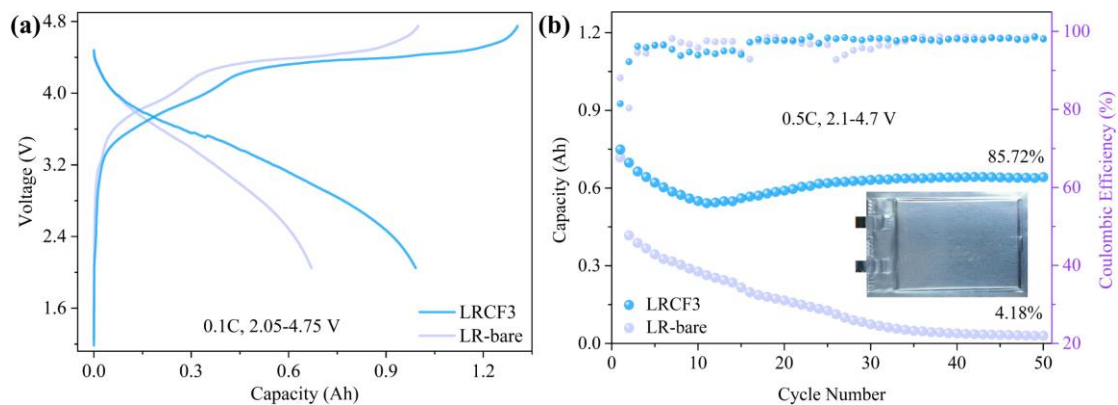

Fig S4. The electrochemical performance of full pouch-cells with SiC as anode and LR-bare and LRCF3 as cathode respectively, (a) the initial charge and discharge curves, (b) cycle performance.

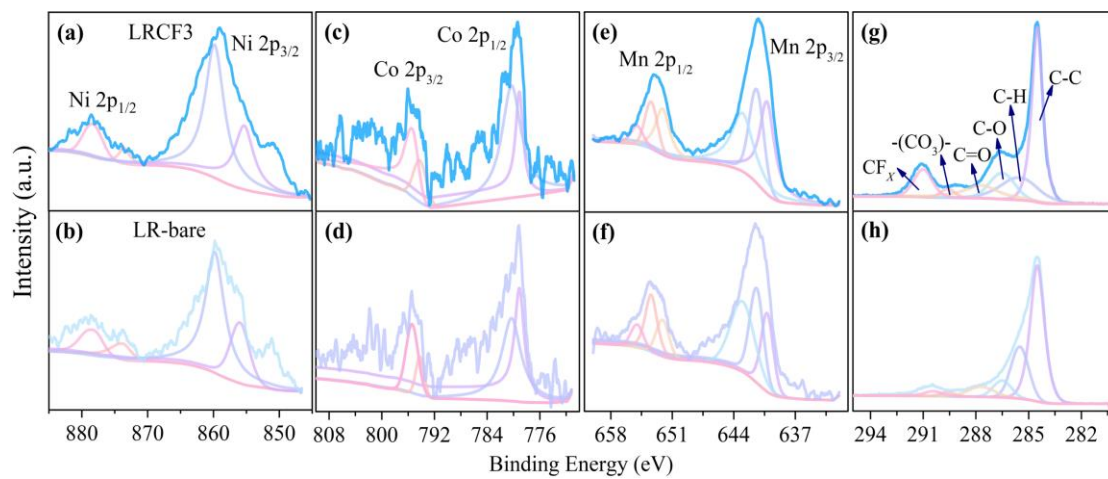

Fig S5. XPS spectra of LR-bare and LRCF3 after the initial discharge, (a-b) Ni 2p, (c-d) Co 2p, (e-f) Mn 2p, (g-h) C 1s.

Table S1. Statistical table for performance comparison between this work and previous studies.

| <b>Materials</b>                                                                              | <b>Maximal capacity@RT (mAh g<sup>-1</sup>)</b> | <b>ICE (%)</b> | <b>Rate capabilities (mAh g<sup>-1</sup>)</b> | <b>Voltage (V)</b> | <b>Capacity retention (%/cycle/rate)</b> | <b>Re</b> |
|-----------------------------------------------------------------------------------------------|-------------------------------------------------|----------------|-----------------------------------------------|--------------------|------------------------------------------|-----------|
| Li <sub>1.13</sub> Mn <sub>0.517</sub> Ni <sub>0.256</sub> Co <sub>0.097</sub> O <sub>2</sub> | 261.5(0.1C)                                     | 88.1           | 0.5C/210                                      | 2.0-4.8            | 85.3/300/0.5C                            | 1         |
| Li <sub>1.2</sub> Mn <sub>0.54</sub> Co <sub>0.13</sub> Ni <sub>0.13</sub> O <sub>2</sub>     | 277.1(0.2C)                                     | 71.2           | 5C/133                                        | 2.0-4.8            | 81.9/100/1C                              | 2         |
| Li <sub>1.14</sub> Ni <sub>0.133</sub> Co <sub>0.133</sub> Mn <sub>0.544</sub> O <sub>2</sub> | 390(0.1C)                                       | 99.5           | 5C/131                                        | 2.0-4.8            | ~78/100/1C                               | 3         |
| Li <sub>1.2</sub> Mn <sub>0.54</sub> Co <sub>0.13</sub> Ni <sub>0.13</sub> O <sub>2</sub>     | 289.5(0.1C)                                     | 82.4           | 5C/182.9                                      | 2.0-4.8            | 94.6/100/0.5C                            | 4         |
| Li <sub>1.2</sub> Ni <sub>0.2</sub> Mn <sub>0.6</sub> O <sub>2</sub>                          | 288(0.1C)                                       | 95.9           | 5C/~90                                        | 2.0-4.8            | 91/100/0.2C                              | 5         |
| Li <sub>1.2</sub> Mn <sub>0.54</sub> Co <sub>0.13</sub> Ni <sub>0.13</sub> O <sub>2</sub>     | 305.5(0.1C)                                     | 94.15          | 5C/213.1                                      | 2.0-4.8            | 94.07/100/1C                             | This work |

Table S2. The equivalent circuit fitting results corresponding to the EIS of LR-bare and LRCF3.

| <b>Samples</b> | <b>R<sub>s</sub> (Ω)</b> | <b>R<sub>sf</sub> (Ω)</b> | <b>R<sub>ct</sub> (Ω)</b> |
|----------------|--------------------------|---------------------------|---------------------------|
| LR-bare        | 3.13                     | 115.90                    | 172.70                    |
| LRCF3          | 2.57                     | 109.10                    | 85.96                     |

## References:

- 1 X. Zhang, J. Zhao, G.-H. Lee, Y. Liang, B. Wang, S. Liu, E. Wang, W. Yang and H. Yu, *Adv. Energy Mater.*, 2023, **13**, 2202929.
- 2 L. Di, C. Yufang, S. Weiwei, X. Wei, Y. Shuaiyu, L. Shiqiang, Z. Lanlan, Z. Yanshuang, Y. Tianyan, X. Peitao and Z. Chunman, *Adv. Energy Mater.*, 2023, **13**, 2301765.
- 3 B. Jiang, B. Luo, J. Li, P. Peng, J. Chen, L. Chu, Y. Li and M. Li, *Ceramics International*, 2019, **45**, 160–167.
- 4 F. Zheng, Q. Deng, W. Zhong, X. Ou, Q. Pan, Y. Liu, X. Xiong, C. Yang, Y. Chen and M. Liu, *ACS Sustainable Chem. Eng.*, 2018, **6**, 16399–16411.
- 5 Y. Jiang, G. Sun, F. Yu, L. Que, L. Deng, X. Meng and Z. Wang, *Ionics*, 2020, **26**, 151–161.
